# Supplementary material for: IL-23, but not IL-12, plays a critical role in inflammation-mediated bone disorders
Source: PubMed Central journal article supplement (PMC7086346; doi:10.7150/thno.41378), 2020-03-04
Supplement: thnov10p3925s1.pdf [file thnov10p3925s1.pdf]

## Supplementary Figure

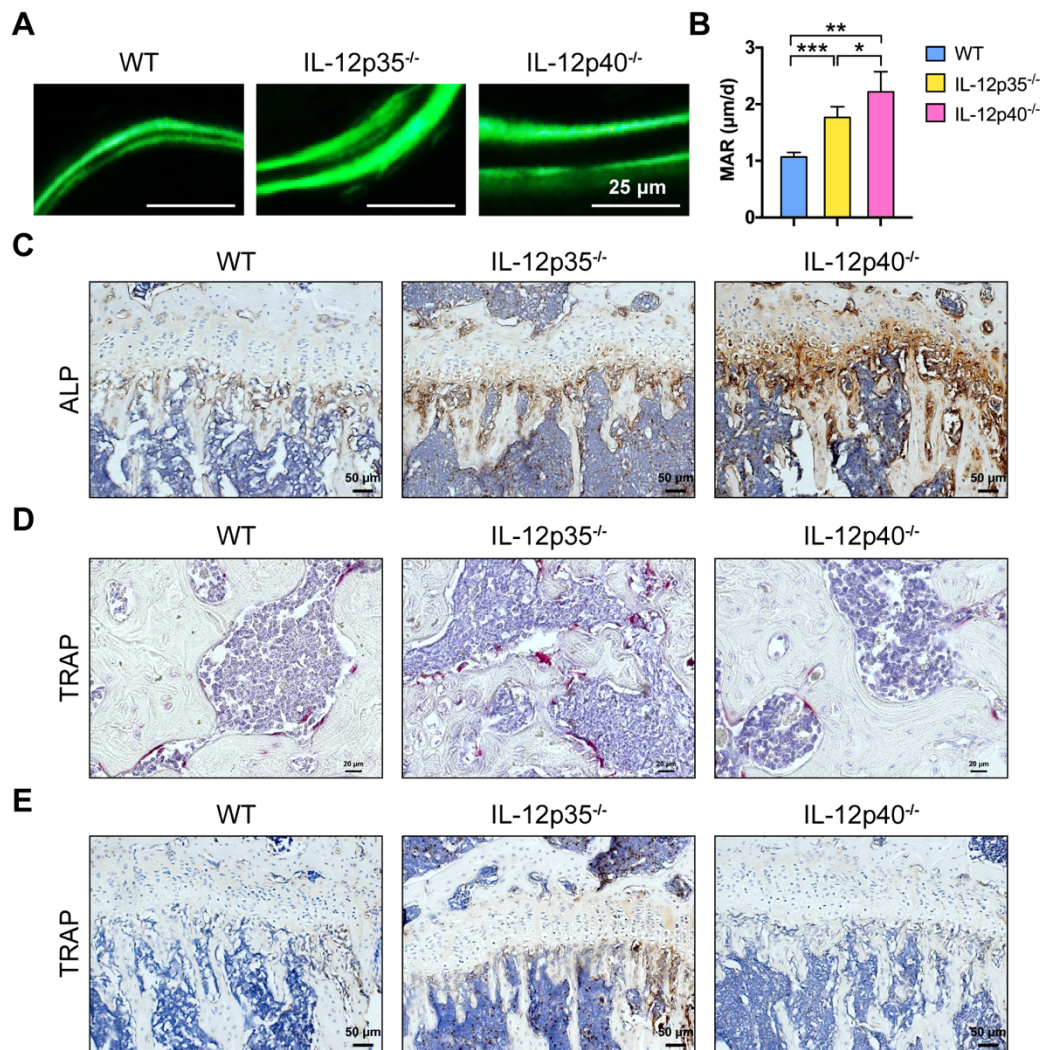

**Figure S1. Coupling the activities of bone formation and resorption by IL-12 and IL-23.**

(A) Representative images of new bone formation at distal femur metaphysis assessed by calcein double labeling in 2-month-old WT, IL-12p35<sup>-/-</sup>, and IL-12p40<sup>-/-</sup> mice. *n* = 5 per group. Scale bar, 25 µm. (B) Quantification of bone histomorphometric results, indicated by mineral apposition rate (MAR). (C–E) Bone formation and resorption were detected by ALP and TRAP activity, respectively. (C) The immunohistochemical staining for ALP on sections of mouse femurs. *n* = 5 per group. Scale bar, 50 µm. (D) TRAP staining of distal femur sections from WT, IL-12p35<sup>-/-</sup>, and IL-12p40<sup>-/-</sup> mice. *n* = 5 per group. Scale bar, 20 µm. (E) The immunohistochemical staining for TRAP on sections of mouse femurs. *n* = 5 per group. Scale bar, 50 µm. ALP, alkaline phosphatase;

TRAP, tartrate-resistant acid phosphatase; WT, wild-type. Results are shown as mean  $\pm$  S.D. \* $p$ <0.05, \*\* $p$ <0.01, \*\*\* $p$ <0.001.

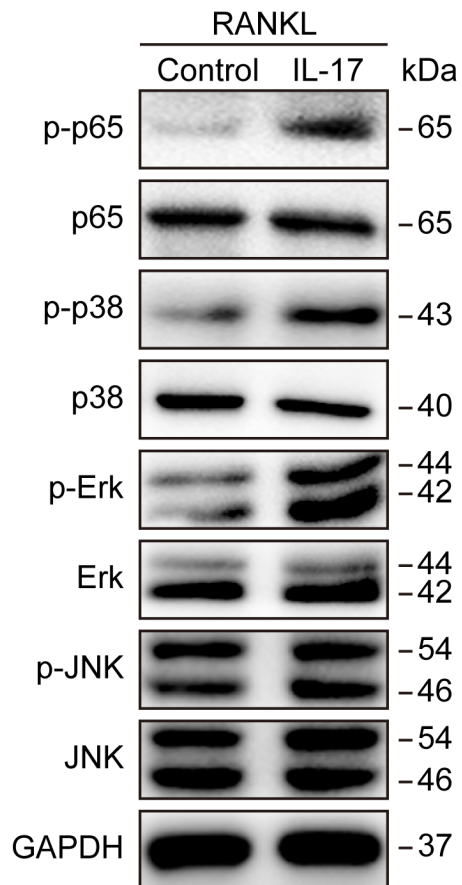

**Figure S2. IL-17 activates NF- $\kappa$ B and MAPK signaling pathways in RAW264.7 cells.**

Western blot analysis showed that IL-17 (75 ng/mL) impaired osteoclast differentiation by activation of NF- $\kappa$ B, p38, and Erk signaling pathways. RANKL, receptor activator of NF- $\kappa$ B ligand.

**Supplementary Table 1: Primers used for quantitative real-time PCR.**

| <b>Genes</b>                    | <b>Forward primer</b>         | <b>Reverse primer</b>         |
|---------------------------------|-------------------------------|-------------------------------|
| <i>ALP</i>                      | AGGGCAATGAGGTCACATCC          | GCATCTCGTTATCCGAGTACC<br>AG   |
| <i>OCN</i>                      | AAGCAGGAGGGCAATAAGGT          | TTTGTAGGCGGTCTTCAAGC          |
| <i>TRAP</i>                     | ACACAGTGATGCTGTGTGGC<br>AACTC | CCAGAGGCTTCCACATATATG<br>ATGG |
| <i>RANKL</i>                    | CAGCATCGCTCTGTTCTGTA          | CTGCGTTTTTCATGGAGTCTCA        |
| <i><math>\beta</math>-actin</i> | ACTGGGACGACATGGAGAAG          | GGGGTGTTGAAGGTCTCAA           |

ALP: alkaline phosphatase; OCN: osteocalcin; TRAP: tartrate-resistant acid phosphatase; RANKL: receptor activator of NF- $\kappa$ B ligand.
